# Supplementary material for: Missense Variants in COL4A1/2 Are Associated with Cerebral Aneurysms: A Case Report and Literature Review
Source: MDPI journal article supplement (doi:10.3390/neurolint16010015), 2024-02-01

## SUPPLEMENTARY Materials

### Literature search

#1.

("Collagen Type IV"[Mesh] AND "alpha?1"[All Fields]) OR ("Collagen Type IV"[Mesh] AND "alpha?2"[All Fields]) OR "Collagen Type IV alpha 1"[All Fields] OR "Collagen Type IV alpha 2"[All Fields] OR "COL4A1 protein, human"[Supplementary Concept] OR "COL4A2 protein, human"[Supplementary Concept] OR COL4A1[All Fields] OR COL4A2[All Fields]

#2.

Stroke[Mesh] OR Stroke[All Fields] OR "Cerebral Small Vessel Diseases"[Mesh] OR "Cerebral Small Vessel Diseases"[All Fields] OR (Cerebral[All Fields] AND Small[All Fields] AND Vessel[All Fields] AND Diseases[All Fields]) OR CSVD[All Fields] OR SVD[All Fields] OR Hemorrhage[Mesh] OR "Hemorrhagic"[All Fields] OR Leukoencephalopathies[Mesh] OR Leukoencephalopathies [All Fields] OR Leukoencephalopathy[All Fields] OR "cerebral aneurysm"[All Fields] OR "intracranial aneurysm"[All Fields] OR (cerebral[All Fields] AND aneurysm[All Fields]) OR (intracranial[All Fields] AND aneurysm[All Fields]) OR "intracerebral hemorrhage"[All Fields] OR "intracerebral haemorrhage"[All Fields] OR (intracerebral [All Fields] AND hemorrhage [All Fields]) OR (intracerebral [All Fields] AND haemorrhage [All Fields]) OR "intracranial hemorrhage"[All Fields] OR "intracranial haemorrhage"[All Fields] OR (intracranial [All Fields] AND hemorrhage [All Fields]) OR (intracranial [All Fields] AND haemorrhage [All Fields]) OR "cerebral hemorrhage"[All Fields] OR "cerebral haemorrhage"[All Fields] OR Microbleeds[All Fields] OR (cerebral [All Fields] AND hemorrhage [All Fields]) OR (cerebral [All Fields] AND haemorrhage [All Fields]) OR Dementia[Mesh] OR Dementia[All Fields] OR "Dementia, Vascular"[Mesh] OR "Vascular Dementia"[All Fields] OR (Vascular[All Fields] AND Dementia[All Fields]) OR "Dementia, Multi-Infarct"[Mesh] OR "Cognitive Dysfunction"[Mesh] OR "Cognitive Dysfunction"[All Fields] OR "Cognitive Impairment"[All Fields] OR (Cognitive[All Fields] AND Impairment[All Fields])

#3.

"autosomal dominant"[All Fields] OR "autosomal recessive"[All Fields] OR familial[All Fields] OR hereditary[All Fields] OR Hematuria[Mesh] OR Hematuria[All Fields] OR "artery tortuosity"[All Fields] OR "arterial tortuosity"[All Fields] OR Porencephaly[Mesh] OR Porencephaly[All Fields]

---

#4.

“Angiopathy, Hereditary, With Nephropathy, Aneurysms, And Muscle Cramps”[Supplementary Concept] OR HANAC[All Fields] OR (Angiopathy[All Fields] AND Hereditary[All Fields] AND Nephropathy[All Fields] AND Aneurysms[All Fields] AND “Muscle Cramps”[All Fields]) OR PADMAL [All Fields] OR (pontine[All Fields] AND autosomal[All Fields] AND dominant[All Fields] AND microangiopathy[All Fields] AND leukoencephalopathy[All Fields]) OR (“multi-infarct”[All Fields] AND dementia [All Fields] AND Swedish [All Fields]) OR hMID[All Fields] OR HEMID[All Fields]

#1 AND (#2 OR #3) OR #4

**Supplementary Table S1. The results of ACMG classification of excluded mutations**

| Mutations               | rsID        | ClinVar              | PVS | PS | PM   | PP   | BS | BP   | ACMG criteria |
|-------------------------|-------------|----------------------|-----|----|------|------|----|------|---------------|
| <i>COL4A2</i>           |             |                      |     |    |      |      |    |      |               |
| c.3368A>G, p.Glu1123Gly | rs117412802 | Benign/Likely Benign | -   | -  | 1, 2 | 3    | 4  | 4, 6 | Likely benign |
| c.3448C>A, p.Gln1150Lys | NA          | Benign/Likely Benign | -   | -  | 1, 2 | 3, 4 | -  | 4, 6 | Likely benign |
| c.5068G>A, p.Ala1690Thr | rs201105747 | Benign/Likely Benign | -   | -  | 2    | 3    | -  | 4, 6 | Likely benign |

NA indicates not available.

Supplementary Table S2. Mutations included in this study

| Mutations                | Mutation Type | Domain | Triplet | Exon, Intron | Allele frequency | rsID         | ACMG Criteria          | Aneurysm | Ref     |
|--------------------------|---------------|--------|---------|--------------|------------------|--------------|------------------------|----------|---------|
| Duplication/CNV          | -             | -      | -       | -            | -                | NA           | Uncertain significance | Negative | [30]    |
| Duplication/CNV          | -             | -      | -       | -            | -                | NA           | Uncertain significance | Negative | [31]    |
| Duplication/CNV          | -             | -      | -       | -            | -                | NA           | Uncertain significance | Negative | [32]    |
| <i>COL4A1</i>            |               |        |         |              |                  |              |                        |          |         |
| c.1A>T                   | Start Codon   | Signal | -       | 1            | -                | NA           | Pathogenic             | Positive | [33]    |
| c.236G>T, p.Gly79Val     | Missense      | 7S     | M-X-Y   | 4            | -                | NA           | Uncertain significance | Negative | [34]    |
| c.347C>T, p.Pro116Leu    | Missense      | 7S     | G-M-Y   | 6            | 0.00001972       | rs538816765  | Uncertain significance | Positive | [35,36] |
| c.553-2A>G               | Splice Site   | Triple | -       | Intron 9     | -                | NA           | Pathogenic             | Negative | [19]    |
| c.1120+2_1120+8del       | Splice Site   | Triple | -       | Intron 20    | -                | NA           | Pathogenic             | Negative | [18]    |
| c.1249G>C, p.Gly417Arg   | Missense      | Triple | M-X-Y   | 21           | -                | NA           | Pathogenic             | Positive | [22]    |
| c.1493G>T, p.Gly498Val   | Missense      | Triple | M-X-Y   | 24           | -                | NA           | Pathogenic             | Positive | [1,6]   |
| c.1502G>A, p.Gly501Asp   | Missense      | Triple | M-X-Y   | 24           | -                | NA           | Pathogenic             | Positive | [37]    |
| c.1528G>A, p.Gly510Arg   | Missense      | Triple | M-X-Y   | 24           | -                | NA           | Pathogenic             | Positive | [38–40] |
| c.1537-2delA             | Splice Site   | Triple | -       | Intron 24    | -                | NA           | Pathogenic             | Negative | [41]    |
| p.Arg538Trp              | Missense      | Triple | Other   | 25           | -                | NA           | Uncertain significance | Positive | [42]    |
| c.1555G>A, p.Gly519Arg   | Missense      | Triple | M-X-Y   | 25           | -                | NA           | Pathogenic             | Positive | [1,6]   |
| c.1573GG>TT, p.Gly525Leu | Missense      | Triple | M-X-Y   | 25           | -                | NA           | Pathogenic             | Positive | [40]    |
| c.1583G>A, p.Gly528Glu   | Missense      | Triple | M-X-Y   | 25           | -                | NA           | Pathogenic             | Positive | [1,6]   |
| c.1937G>C, p.Gly646Ala   | Missense      | Triple | M-X-Y   | 27           | 0.000006573      | rs532972509  | Pathogenic             | Negative | [43]    |
| c.1942C>G, p.Pro648Ala   | Missense      | Triple | G-X-M   | 27           | 0.000006569      | rs1413099763 | Likely pathogenic      | Positive | [23]    |
| c.1961C>A, p.Prp654Gln   | Missense      | Triple | G-X-M   | 27           | 0.00001314       | rs758315813  | Likely pathogenic      | Positive | [44]    |
| c.2063G>A, p.Gly688Asp   | Missense      | Triple | M-X-Y   | 28           | -                | NA           | Likely pathogenic      | Negative | [45]    |
| c.2086G>A, p.Gly696Ser   | Missense      | Triple | M-X-Y   | 28           | -                | NA           | Pathogenic             | Negative | [46]    |
| c.2159G>A, p.Gly720Asp   | Missense      | Triple | M-X-Y   | 29           | -                | NA           | Pathogenic             | Positive | [24,47] |

|                              |             |        |       |           |   |    |                        |                  |
|------------------------------|-------------|--------|-------|-----------|---|----|------------------------|------------------|
| c.2263G>A, p.Gly755Arg       | Missense    | Triple | M-X-Y | 30        | - | NA | Pathogenic             | Positive [48,49] |
| c.2317G>A, p.Gly773Arg       | Missense    | Triple | M-X-Y | 30        | - | NA | Pathogenic             | Negative [50]    |
| c.2327G>T, p.Gly776Val       | Missense    | Triple | M-X-Y | 30        | - | NA | Pathogenic             | Negative [51]    |
| c.2413G>A, p.Gly805Arg       | Missense    | Triple | M-X-Y | 31        | - | NA | Pathogenic             | Negative [52]    |
| c.2494G>A, p.Gly832Arg       | Missense    | Triple | M-X-Y | 32        | - | NA | Pathogenic             | Negative [53]    |
| c.2504G>A, p.Gly835Glu       | Missense    | Triple | M-X-Y | 32        | - | NA | Pathogenic             | Positive [54]    |
| c.2662G>C, p.Gly888Arg       | Missense    | Triple | M-X-Y | 33        | - | NA | Pathogenic             | Positive [22]    |
| c.2969G>T, p.Gly990Val       | Missense    | Triple | M-X-Y | 36        | - | NA | Likely pathogenic      | Negative [55]    |
| c.3715G>A, p.Gly1239Arg      | Missense    | Triple | M-X-Y | 42        | - | NA | Likely pathogenic      | Positive [56]    |
| c.3734G>A, p.Gly1245Asp      | Missense    | Triple | M-X-Y | 42        | - | NA | Pathogenic             | Positive Ours    |
| c.3797G>T, p.Gly1266Val      | Missense    | Triple | M-X-Y | 43        | - | NA | Likely pathogenic      | Negative [57]    |
| c.3976G>A, p.Gly1326Arg      | Missense    | Triple | M-X-Y | 45        | - | NA | Pathogenic             | Negative [58]    |
| c.4031G>C, p.Gly1344Ala      | Missense    | Triple | M-X-Y | 46        | - | NA | Likely pathogenic      | Negative [59]    |
| c.4150+1G>T                  | Splice Site | Triple | -     | Intron 46 | - | NA | Pathogenic             | Negative [20]    |
| c.4380T>G, p.Cys1460Trp      | Missense    | NC1    | Other | 48        | - | NA | Uncertain significance | Negative [60]    |
| c.4611_4612insG, p.Thr1537fs | Frameshift  | NC1    | Other | 49        | - | NA | Pathogenic             | Negative [61]    |
| c.*32G>A                     | 3'UTR       | -      | Other | 3'UTR     | - | NA | Likely pathogenic      | Negative [62]    |
| c.*32G>T                     | 3'UTR       | -      | Other | 3'UTR     | - | NA | Likely pathogenic      | Negative [63]    |
| c.*34G>T                     | 3'UTR       | -      | Other | 3'UTR     | - | NA | Uncertain significance | Negative [64]    |
| c.*35C>A                     | 3'UTR       | -      | Other | 3'UTR     | - | NA | Likely pathogenic      | Negative [65]    |
| COL4A2                       |             |        |       |           |   |    |                        |                  |
| c.1837G>A, p.Gly613Ser       | Missense    | Triple | M-X-Y | 24        | - | NA | Pathogenic             | Negative [66]    |
| c.2105G>A, p.Gly702Asp       | Missense    | Triple | M-X-Y | 28        | - | NA | Pathogenic             | Positive [67]    |
| c.2572A>G, p.Ile858Val       | Missense    | Triple | G-M-Y | 29        | - | NA | Uncertain significance | Negative [68]    |
| c.2821G>A, p.Gly941Arg       | Missense    | Triple | M-X-Y | 32        | - | NA | Pathogenic             | Positive [69]    |
| c.2972G>A, p.Gly991Glu       | Missense    | Triple | M-X-Y | 32        | - | NA | Pathogenic             | Positive [70]    |
| c.3110G>A, p.Gly1037Glu      | Missense    | Triple | M-X-Y | 33        | - | NA | Pathogenic             | Negative [2]     |

|                            |            |        |           |    |                 |                 |                           |               |
|----------------------------|------------|--------|-----------|----|-----------------|-----------------|---------------------------|---------------|
| c.3206delC                 | Frameshift | Triple | Other     | 34 | -               | NA              | Pathogenic                | Negative [71] |
| c.3455G>A,<br>p.Gly1152Asp | Missense   | Triple | M-X-<br>Y | 37 | -               | NA              | Pathogenic                | Negative [2]  |
| c.4165G>A,<br>p.Gly1389Arg | Missense   | Triple | M-X-<br>Y | 44 | 0.0000065<br>74 | NA              | Pathogenic                | Positive [71] |
| p.Ala1534Ser               | Missense   | NC1    | Other     | 46 | 0.0000131<br>4  | rs76039938<br>6 | Uncertain<br>significance | Negative [72] |

CNV, copy number variant; UTR, untranslated region; NC1, non-collagenous domain; NA, not available. G-M-Y indicates that the mutation is located at the amino acid position after the glycine residue in the glycine triplet sequence. G-X-M indicates that the mutation is located at amino acid position two after the glycine residue in the glycine triplet sequence. M-X-Y indicates that the mutation is located at the glycine position in the glycine triplet sequence.

**Supplementary Table S3. The results of in silico analysis and ACMG classification of included mutations in this study**

| Mutations                   | ClinVar                         | delta score of SpliceAI |               |                  |               | MaxEntScan,<br>%Variance | CADD,<br>PHRED | PolyPhen2 | SIFT        | Provean     | ACMG |      |      |            | Ref         |
|-----------------------------|---------------------------------|-------------------------|---------------|------------------|---------------|--------------------------|----------------|-----------|-------------|-------------|------|------|------|------------|-------------|
|                             |                                 | Acceptor<br>Loss        | Donor<br>Loss | Acceptor<br>Gain | Donor<br>Gain |                          |                |           |             |             | PVS  | PS   | PM   | PP         |             |
| Duplication/CNV             | NA                              | -                       | -             | -                | -             | -                        | -              | NA        | NA          | NA          | -    | -    | 2    | 4          | [30]        |
| Duplication/CNV             | NA                              | -                       | -             | -                | -             | -                        | -              | NA        | NA          | NA          | -    | -    | 2, 6 | 4          | [31]        |
| Duplication/CNV             | NA                              | -                       | -             | -                | -             | -                        | -              | NA        | NA          | NA          | -    | -    | 2    | 4          | [32]        |
| <i>COL4A1</i>               |                                 |                         |               |                  |               |                          |                |           |             |             |      |      |      |            |             |
| c.1A>T                      | Pathogenic                      | -                       | -             | -                | -             | -                        | 23.2           | NA        | NA          | NA          | 1    | -    | 2    | 5          | [33]        |
| c.236G>T, p.Gly79Val        | NA                              | 0                       | 0             | 0                | 0             | 4.8                      | 33.0           | Probably  | Deleterious | Deleterious | -    | -    | 2    | 3, 4       | [34]        |
| c.347C>T, p.Pro116Leu       | Uncertain Significance          | -                       | -             | -                | -             | -                        | 24.1           | Probably  | Tolerated   | Deleterious | -    | -    | 2    | 3          | [35,36]     |
| c.553-2A>G                  | NA                              | 1                       | 0             | 0.29             | 0             | 79.6                     | 32.0           | NA        | NA          | NA          | 1    | 2    | 1, 2 | 3, 4       | [19]        |
| c.1120+2_1120+8del          | NA                              | 0.13                    | 0.99          | 0                | 0.01          | 176.9                    | 23.5           | NA        | NA          | NA          | 1    | -    | 1, 2 | 1, 3, 4    | [18]        |
| c.1249G>C, p.Gly417Arg      | NA                              | -                       | -             | -                | -             | -                        | 21.6           | benign    | Tolerated   | Deleterious | -    | 3    | 1, 2 | 3, 4       | [22]        |
| c.1493G>T, p.Gly498Val      | Pathogenic                      | -                       | -             | -                | -             | -                        | 25.6           | Probably  | Deleterious | Deleterious | -    | 3    | 1, 2 | 3, 4, 5    | [1,6]       |
| c.1502G>A, p.Gly501Asp      | Pathogenic/Likely<br>Pathogenic | -                       | -             | -                | -             | -                        | 25.8           | Probably  | Deleterious | Deleterious | -    | 3    | 1, 2 | 3, 4, 5    | [37]        |
| c.1528G>A, p.Gly510Arg      | Pathogenic/Likely<br>Pathogenic | -                       | -             | -                | -             | -                        | 24.2           | Probably  | Deleterious | Deleterious | -    | 3    | 1, 2 | 1, 3, 4, 5 | [38–<br>40] |
| c.1537-2delA                | NA                              | 0.98                    | 0             | 0.14             | 0.02          | 163.9                    | 29.5           | NA        | NA          | NA          | 1    | 2    | 1, 2 | 3, 4       | [41]        |
| p.Arg538Trp                 | Uncertain Significance          | -                       | -             | -                | -             | -                        | 23.9           | Probably  | Tolerated   | Deleterious | -    | -    | 1, 2 | 3          | [42]        |
| c.1555G>A, p.Gly519Arg      | Pathogenic                      | -                       | -             | -                | -             | -                        | 26.6           | Probably  | Deleterious | Deleterious | -    | 3    | 1, 2 | 3, 4, 5    | [1,6]       |
| c.1573GG>TT,<br>p.Gly525Leu | Pathogenic                      | -                       | -             | -                | -             | -                        | 26             | Probably  | Deleterious | Deleterious | -    | 3    | 1, 2 | 3, 4, 5    | [40]        |
| c.1583G>A, p.Gly528Glu      | Pathogenic                      | -                       | -             | -                | -             | -                        | 27.2           | Probably  | Deleterious | Deleterious | -    | 3    | 1, 2 | 3, 4, 5    | [1,6]       |
| c.1937G>C, p.Gly646Ala      | NA                              | -                       | -             | -                | -             | -                        | 22.7           | Probably  | Tolerated   | Deleterious | -    | 3    | 1, 2 | 3, 4       | [43]        |
| c.1942C>G, p.Pro648Ala      | NA                              | -                       | -             | -                | -             | -                        | 22.6           | Probably  | Tolerated   | Deleterious | -    | -    | 1, 2 | 3, 4       | [23]        |
| c.1961C>A, p.Prp654Gln      | NA                              | -                       | -             | -                | -             | -                        | 19.7           | Possibly  | Deleterious | Deleterious | -    | -    | 1, 2 | 3, 4       | [44]        |
| c.2063G>A, p.Gly688Asp      | NA                              | -                       | -             | -                | -             | -                        | 23.7           | Probably  | Tolerated   | Neutral     | -    | 3    | 1, 2 | 3          | [45]        |
| c.2086G>A, p.Gly696Ser      | Pathogenic                      | -                       | -             | -                | -             | -                        | 27             | Probably  | Deleterious | Deleterious | -    | 2, 3 | 1, 2 | 3, 4, 5    | [46]        |
| c.2159G>A, p.Gly720Asp      | Pathogenic/Likely<br>Pathogenic | -                       | -             | -                | -             | -                        | 25.5           | Probably  | Deleterious | Deleterious | -    | 3    | 1, 2 | 3, 4, 5    | [24,47]     |
| c.2263G>A, p.Gly755Arg      | Pathogenic                      | -                       | -             | -                | -             | -                        | 24.3           | Probably  | Deleterious | Deleterious | -    | 2, 3 | 1, 2 | 3, 4, 5    | [48,49]     |

|                              |                              |      |      |      |      |      |      |          |             |             |   |      |         |         |      |
|------------------------------|------------------------------|------|------|------|------|------|------|----------|-------------|-------------|---|------|---------|---------|------|
| c.2317G>A, p.Gly773Arg       | Pathogenic                   | -    | -    | -    | -    | -    | 24.4 | Probably | Deleterious | Deleterious | - | 2, 3 | 1, 2    | 3, 4, 5 | [50] |
| c.2327G>T, p.Gly776Val       | Likely Pathogenic            | -    | -    | -    | -    | -    | 25.8 | Probably | Deleterious | Deleterious | - | 3    | 1, 2    | 3, 4, 5 | [51] |
| c.2413G>A, p.Gly805Arg       | Likely Pathogenic            | -    | -    | -    | -    | -    | 25.5 | Probably | Deleterious | Deleterious | - | 3    | 1, 2    | 3, 4, 5 | [52] |
| c.2494G>A, p.Gly832Arg       | Pathogenic/Likely Pathogenic | -    | -    | -    | -    | -    | 27.5 | Possibly | Deleterious | Deleterious | - | 2, 3 | 1, 2    | 3, 4, 5 | [53] |
| c.2504G>A, p.Gly835Glu       | NA                           | -    | -    | -    | -    | -    | 26.5 | benign   | Deleterious | Deleterious | - | 2, 3 | 1, 2    | 3, 4    | [54] |
| c.2662G>C, p.Gly888Arg       | Pathogenic/Likely Pathogenic | -    | -    | -    | -    | -    | 25.9 | Possibly | Deleterious | Deleterious | - | 2, 3 | 1, 2    | 3, 5    | [22] |
| c.2969G>T, p.Gly990Val       | Likely Pathogenic            | 0.06 | 0    | 0.01 | 0    | 33.0 | 33   | Probably | Deleterious | Deleterious | - | -    | 1, 2, 5 | 3, 4, 5 | [55] |
| c.3715G>A, p.Gly1239Arg      | Pathogenic                   | -    | -    | -    | -    | -    | 26.4 | Probably | Deleterious | Deleterious | - | -    | 1, 2    | 3, 4, 5 | [56] |
| c.3734G>A, p.Gly1245Asp      | NA                           | -    | -    | -    | -    | -    | 26.3 | Probably | Deleterious | Deleterious | - | 3    | 1, 2    | 3, 4    | Ours |
| c.3797G>T, p.Gly1266Val      | NA                           | -    | -    | -    | -    | -    | 24.1 | Probably | Deleterious | Deleterious | - | 3    | 1, 2    | 3       | [57] |
| c.3976G>A, p.Gly1326Arg      | Pathogenic                   | -    | -    | -    | -    | -    | 26.9 | Probably | Deleterious | Deleterious | - | 2, 3 | 1, 2    | 3, 5    | [58] |
| c.4031G>C, p.Gly1344Ala      | NA                           | -    | -    | -    | -    | -    | 24.9 | Possibly | Deleterious | Deleterious | - | 3    | 1, 2    | 3       | [59] |
| c.4150+1G>T                  | NA                           | 0    | 0.99 | 0    | 0.05 | 97.9 | 33   | NA       | NA          | NA          | 1 | 2    | 1, 2    | 3, 4    | [20] |
| c.4380T>G, p.Cys1460Trp      | NA                           | -    | -    | -    | -    | -    | 25.7 | Probably | Deleterious | Deleterious | - | -    | 2       | 3       | [60] |
| c.4611_4612insG, p.Thr1537fs | NA                           | -    | -    | -    | -    | -    | 33   | NA       | NA          | NA          | 1 | -    | 2       | 4       | [61] |
| c.*32G>A                     | Likely Pathogenic            | -    | -    | -    | -    | -    | 19.2 | NA       | NA          | NA          | - | 3    | 2       | 4, 5    | [62] |
| c.*32G>T                     | Pathogenic                   | -    | -    | -    | -    | -    | 18.7 | NA       | NA          | NA          | - | 3    | 2       | 4, 5    | [63] |
| c.*34G>T                     | NA                           | -    | -    | -    | -    | -    | 18.9 | NA       | NA          | NA          | - | -    | 2       | 4, 5    | [64] |
| c.*35C>A                     | Pathogenic                   | -    | -    | -    | -    | -    | 19   | NA       | NA          | NA          | - | 3    | 2       | 4, 5    | [65] |
| COL4A2                       |                              |      |      |      |      |      |      |          |             |             |   |      |         |         |      |
| c.1837G>A, p.Gly613Ser       | NA                           | -    | -    | -    | -    | -    | 24.7 | Probably | Deleterious | Deleterious | - | 3    | 1, 2    | 3, 4    | [66] |
| c.2105G>A, p.Gly702Asp       | NA                           | -    | -    | -    | -    | -    | 27.5 | Probably | Tolerated   | Deleterious | - | 2, 3 | 1, 2    | 3, 4    | [67] |
| c.2572A>G, p.Ile858Val       | NA                           | -    | -    | -    | -    | -    | 1.0  | benign   | Tolerated   | Neutral     | - | -    | 1, 2    | -       | [68] |
| c.2821G>A, p.Gly941Arg       | NA                           | -    | -    | -    | -    | -    | 26.5 | Probably | Deleterious | Deleterious | - | 2, 3 | 1       | 3, 4    | [69] |
| c.2972G>A, p.Gly991Glu       | NA                           | -    | -    | -    | -    | -    | 24.8 | Probably | Deleterious | Deleterious | - | 3    | 1, 2    | 3, 4    | [70] |
| c.3110G>A, p.Gly1037Glu      | Pathogenic                   | -    | -    | -    | -    | -    | 25.7 | Probably | Deleterious | Deleterious | - | 2, 3 | 1, 2    | 3, 4, 5 | [2]  |
| c.3206delC                   | NA                           | -    | -    | -    | -    | -    | 33   | NA       | NA          | NA          | 1 |      | 1, 2    | 4       | [71] |
| c.3455G>A, p.Gly1152Asp      | Pathogenic                   | 0.01 | 0    | 0.03 | 0    | 4.8  | 29.4 | Probably | Deleterious | Deleterious | - | 3    | 1, 2    | 3, 4, 5 | [2]  |
| c.4165G>A, p.Gly1389Arg      | Likely Pathogenic            | -    | -    | -    | -    | -    | 25.5 | Probably | Deleterious | Deleterious | - | 3    | 1, 2    | 3, 4, 5 | [71] |



---

|              |    |   |   |   |   |   |      |          |           |             |   |   |   |      |      |
|--------------|----|---|---|---|---|---|------|----------|-----------|-------------|---|---|---|------|------|
| p.Ala1534Ser | NA | - | - | - | - | - | 25.7 | Probably | Tolerated | Deleterious | - | - | 2 | 3, 4 | [72] |
|--------------|----|---|---|---|---|---|------|----------|-----------|-------------|---|---|---|------|------|

---

CNV, copy number variants; CADD, combined annotation-dependent depletion; probably, probably damaging; possibly damaging; NA, not available.

**Supplementary Table S4. Comparison between CA positive and negative mutations**

|                               | Positive  | Negative  | p-value |
|-------------------------------|-----------|-----------|---------|
| <i>COL4A1</i>                 | n = 18    | n = 22    | -       |
| Mutations                     |           |           |         |
| Missense                      | 17 (94.4) | 13 (59.1) | 0.0126  |
| G-M-Y                         | 1 ( 5.6)  | 0 (0)     | 0.45    |
| G-X-M                         | 2 (11.1)  | 0 (0)     | 0.1962  |
| M-X-Y                         | 13 (72.2) | 12 (54.5) | 0.3319  |
| Charged/Branched-chain AAs    | 14 (77.8) | 9 (40.9)  | 0.0267  |
| Other than missense mutations | 1 ( 5.6)  | 9 (40.9)  | 0.0126  |
| 3'UTR                         | 0 (0)     | 4 (18.2)  | 0.1135  |
| Frameshift                    | 0 (0)     | 1 (4.5)   | 1       |
| Splice Site                   | 0 (0)     | 4 (18.2)  | 0.1135  |
| Start Codon                   | 1 ( 5.6)  | 0 (0)     | 0.45    |
| Domain                        |           |           |         |
| 7S                            | 1 (5.6)   | 1 (4.5)   | 1       |
| NC1                           | 0 (0)     | 2 (9.1)   | 0.4923  |
| Signal                        | 1 ( 5.6)  | 0 (0)     | 0.45    |
| Triple-helical                | 16 (88.9) | 15 (68.2) | 0.1489  |
| <i>COL4A2</i>                 | n = 4     | n = 6     | -       |
| Mutation type                 |           |           |         |
| Missense                      | 4 (100)   | 5 (83.3)  | 1       |
| G-M-Y                         | 0 (0)     | 1 (16.7)  | 1       |
| M-X-Y                         | 4 (100)   | 3 (50.0)  | 0.2     |
| Charged/Branched-chain AAs    | 4 (100)   | 3 (50.0)  | 0.2     |
| Frameshift                    | 0 (0)     | 1 (16.7)  | 1       |
| Domain                        |           |           |         |
| NC1                           | 0 (0)     | 1 (16.7)  | 1       |
| Triple-helical                | 4 (100)   | 5 (83.3)  | 1       |

G-M-Y indicates that the mutation is located at the amino acid position after the glycine residue in the glycine triplet sequence. G-X-M indicates that the mutation is located at amino acid position two after the glycine residue in the glycine triplet sequence. M-X-Y indicates that the mutation is located at the glycine position in the glycine triplet sequence. The UTR represents the untranslated region. NC1 represents the non-collagenous domain. AAs are amino acids. CNV is an abbreviation for copy number variant.

**Supplementary Table S5. Comparison of clinical and imaging findings between the CA-positive and CA-negative groups.**

|                                        | CA positive         | CA negative         | p-value |
|----------------------------------------|---------------------|---------------------|---------|
|                                        | n = 25              | n = 51              |         |
| Age at examination, mean $\pm$ sd, NA  | 37.4 $\pm$ 13.9, 7  | 31.2 $\pm$ 19.4, 2  | 0.2183  |
| Median [IQR]                           | 35.5 [24,50]        | 31 [17, 46.5]       | -       |
| Age at stroke onset, mean $\pm$ sd, NA | 32.3 $\pm$ 14.0, 13 | 30.2 $\pm$ 15.6, 26 | 0.8710  |
|                                        | 33.5 [21, 42.5]     | 34 [17, 43.25]      | -       |
| Male, n (%), NA                        | 8 (34.8), 2         | 26 (52.0), 1        | 0.2113  |
| Risk factors                           |                     |                     |         |
| HT, n (%), NA                          | 1 (10),15           | 5 (17.9),23         | 1       |
| Smoking, n (%), NA                     | 1 (12.5),17         | 6 (50.0),39         | 0.1580  |

|                                                           |               |               |          |
|-----------------------------------------------------------|---------------|---------------|----------|
| Family history                                            |               |               |          |
| Family history, non-SAH stroke n (%), NA                  | 13 (61.9), 4  | 17 (40.5), 9  | 0.12     |
| Family history, SAH n (%), NA                             | 1 (5.0), 5    | 1 (2.6), 13   | 1        |
| Family history, CA, n (%), NA                             | 6 (66.7), 16  | 9 (50.0), 33  | 0.6828   |
| Region, n (%)                                             |               |               |          |
| Africa                                                    | 0             | 1 (2.0)       |          |
| Asia                                                      | 6 (24.0)      | 14 (27.5)     |          |
| Central/South America                                     | 1 (4)         | 2 (3.9)       |          |
| Europe                                                    | 16 (64.0)     | 26 (51.0)     | 0.85586* |
| Middle East                                               | 0             | 2 (3.9)       |          |
| North America                                             | 2 (8.0)       | 5 (9.8)       |          |
| Undetermined                                              | 0             | 1 (2.0)       |          |
| De Novo mutation , n (%)                                  | 4 (16.0)      | 9 (17.6)      | 1        |
| Stroke                                                    | 15 (62.5), 1  | 29 (58.0), 1  | 0.8030   |
| Ischemic stroke n (%), NA                                 | 8 (38.1), 4   | 15 (31.3), 3  | 0.5906   |
| ICH n (%), NA                                             | 5 (22.7), 3   | 14 (29.8), 4  | 0.7731   |
| SAH n (%), NA                                             | 0 (0), 4      | 1 (2.2), 5    | 1        |
| Other stroke n (%), NA                                    | 0 (0), 4      | 0 (0), 5      | 1        |
| Migraine, n (%), NA                                       | 4 (44.4), 16  | 1 (6.3), 35   | 0.0403   |
| Cognitive impairments/intellectual abnormality, n (%), NA | 4 (40), 15    | 16 (59.3), 24 | 0.4597   |
| RAT, n (%), NA                                            | 11 (64.7), 8  | 14 (58.3), 27 | 0.7533   |
| Muscle Cramp, n (%), NA                                   | 9 (60.0), 10  | 10 (50.0), 31 | 0.7338   |
| Nephropathy, n (%), NA                                    | 10 (71.4), 11 | 13 (52.0), 26 | 0.3172   |
| Seizure, n (%), NA                                        | 2 (28.6), 18  | 11 (73.3), 36 | 0.0743   |
| Brain imaging findings                                    |               |               |          |
| Structure abnormality of CNS, n (%), NA                   | 3 (27.3), 14  | 15 (46.9), 19 | 0.3090   |
| Leukoencephalopathy, n (%), NA                            | 20 (87.0), 2  | 34 (69.4), 2  | 0.1480   |
| MBs, n (%), NA                                            | 10 (90.9), 14 | 19 (82.6), 28 | 1        |
| Lacunar, n (%), NA                                        | 6 (60.0), 15  | 16 (69.6), 28 | 0.6960   |
| Aneurysm, n (%), NA                                       | 25 (100), 0   | -             | -        |
| ICA, n (%), NA                                            | 19 (86.4), 3  | -             | -        |
| MCA, n (%), NA                                            | 1 (4.8), 4    | -             | -        |
| Acom, n (%), NA                                           | 1 (4.8), 4    | -             | -        |
| Pcom, n (%), NA                                           | 1 (4.8), 4    | -             | -        |
| BA, n (%), NA                                             | 2 (9.5), 4    | -             | -        |
| SCA, n (%), NA                                            | 1 (4.8), 4    | -             | -        |
| Multiple, n (%), NA                                       | 12 (54.5), 3  | -             | -        |
| The other large vessel abnormality, n(%), NA              | 7 (33.3), 4   | 8 (20.5), 12  | 0.3521   |
| Stenosis/Occlusion, n (%), NA                             | 3 (15.0), 5   | 3 (7.7), 12   | 0.3976   |
| Dissection, n (%), NA                                     | 1 (4.8), 4    | 0 (0), 12     | 0.3500   |
| Dolichoectasia, n (%), NA                                 | 3 (15.0), 5   | 2 (5.1), 12   | 0.3246   |
| others, n (%), NA                                         | 1 (4.8), 4    | 4 (10.3), 12  | 0.6486   |

CA indicates cerebral aneurysm; HT, hypertension; SAH, subarachnoid hemorrhage; ICH, intracerebral hemorrhage; RAT, retinal artery tortuosity; CNS, central nervous system; MBs, microbleeds; MRA, magnetic resonance angiography; CTA, computed tomography angiography; ICA, internal carotid artery; MCA, middle cerebral artery; Acom, anterior communicating artery; Pcom, posterior communicating artery; BA, basilar artery; SCA, superior cerebellar artery; NA, not available. \*Chi-squared tests.

Supplementary Figure S1. Flow diagram of included publications

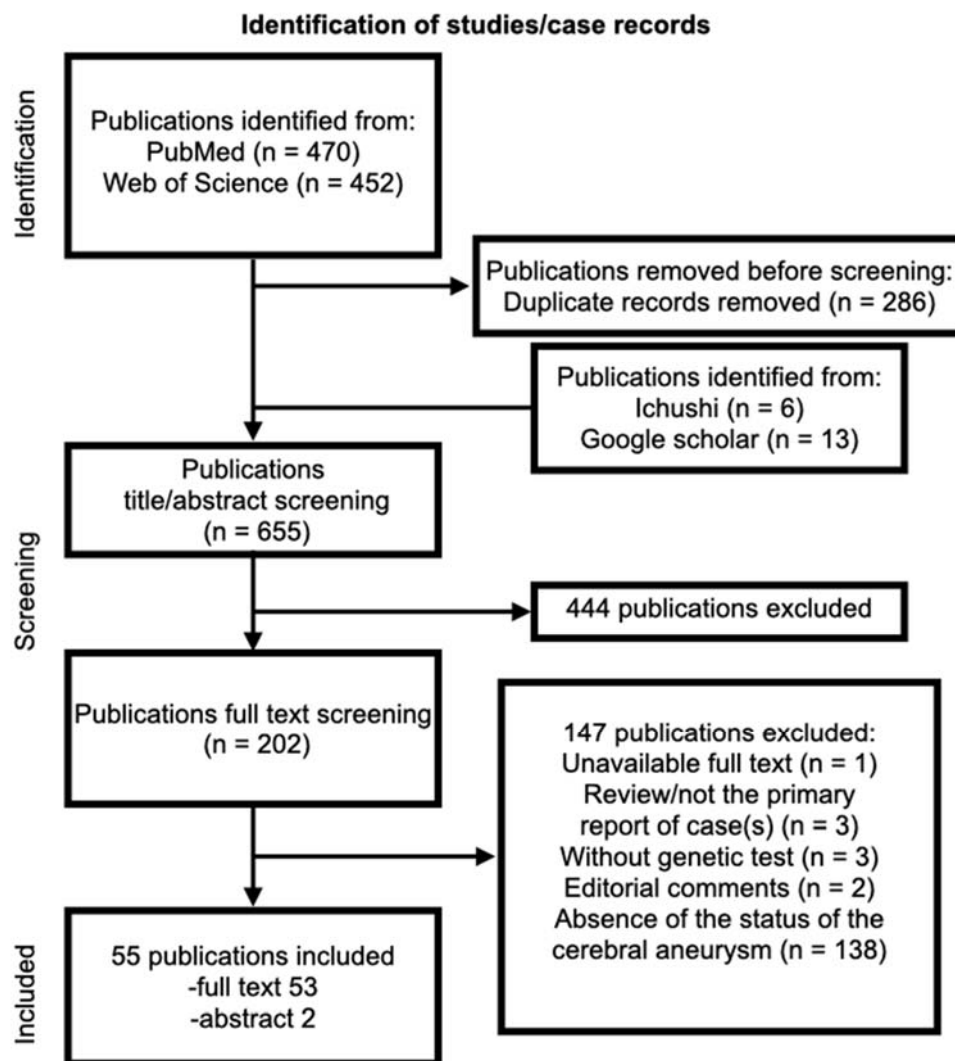

Supplement: s1 [file s1]
